# Supplementary material for: Identification and functional analysis of m6A in the mammary gland tissues of dairy goats at the early and peak lactation stages
Source: Front Cell Dev Biol. 2022 Oct 18;10:945202. doi: 10.3389/fcell.2022.945202 (PMC9623301; doi:10.3389/fcell.2022.945202)
Supplement: Supplementary file 2 [file Table3.XLSX]

## Sheet: Sheet1
Table S3. KEGG annotation for differentially m6A-methylated genes
KEGG_A_class	KEGG_B_class	Pathway	E-vs-P (266)	All (8322)	Pvalue	Qvalue	Pathway ID	Genes	K_IDs
Metabolism	Glycan biosynthesis and metabolism	Glycosaminoglycan biosynthesis - chondroitin sulfate / dermatan sulfate	4	19	0.00270646	0.311167	ko00532	ncbi_102174473(DSE);ncbi_102179262(CHST15);ncbi_102181823(CHPF);ncbi_102188252(XYLT2)	K01794+K08106+K00747+K00771
Genetic Information Processing	Folding, sorting and degradation	Sulfur relay system	3	10	0.00327926	0.311167	ko04122	ncbi_102177176(NFS1);ncbi_106503150(CTU1);ncbi_108633328(LOC108633328)	K04487+K14168+K14168
Environmental Information Processing	Signal transduction	MAPK signaling pathway	19	299	0.00328698	0.311167	ko04010	ncbi_100861165(IGF1R);ncbi_102168441(CACNA1A);ncbi_102168996(INSR);ncbi_102171575(IRAK4);ncbi_102173178(MAP2K7);ncbi_102173438(RAC1);ncbi_102174723(MAP3K12);ncbi_102175206(CRKL);ncbi_102177406(IKBKB);ncbi_102178930(PLA2G4A);ncbi_102180248(TRADD);ncbi_102181186(MET);ncbi_102183001(NF1);ncbi_102184079(MAPKAPK2);ncbi_102185175(GNA12);ncbi_102187630(FLNB);ncbi_102188317(GADD45G);ncbi_102188644(TAOK2)…	K05087+K04344+K04527+K04733+K04431+K04392+K04423+K04438+K07209+K16342+K03171+K05099+K08052+K04443+K04346+K04437+K04402+K04429+K05465
Environmental Information Processing	Signal transduction	TNF signaling pathway	10	122	0.00557446	0.316629	ko04668	ncbi_102170760(FADD);ncbi_102171742(TRAF3);ncbi_102173178(MAP2K7);ncbi_102177406(IKBKB);ncbi_102180018(DNM1L);ncbi_102180248(TRADD);ncbi_102180957(IL15);ncbi_102185184(RIPK3);ncbi_102190798(DAB2IP);ncbi_106502311(LOC106502311)	K02373+K03174+K04431+K07209+K17065+K03171+K05433+K08847+K19901+K05427
Organismal Systems	Nervous system	Neurotrophin signaling pathway	10	122	0.00557446	0.316629	ko04722	ncbi_102171575(IRAK4);ncbi_102173178(MAP2K7);ncbi_102173438(RAC1);ncbi_102175206(CRKL);ncbi_102176334(RAPGEF1);ncbi_102177406(IKBKB);ncbi_102179773(SHC4);ncbi_102182879(PSEN1);ncbi_102184079(MAPKAPK2);ncbi_102189012(PRDM4)	K04733+K04431+K04392+K04438+K06277+K07209+K17449+K04505+K04443+K12463
Human Diseases	Infectious diseases	Kaposi sarcoma-associated herpesvirus infection	13	200	0.0117479	0.437467	ko05167	ncbi_102170760(FADD);ncbi_102170774(TICAM1);ncbi_102171561(PIK3C3);ncbi_102171742(TRAF3);ncbi_102172138(LOC102172138);ncbi_102173178(MAP2K7);ncbi_102173438(RAC1);ncbi_102177406(IKBKB);ncbi_102180248(TRADD);ncbi_102183886(RB1);ncbi_102184079(MAPKAPK2);ncbi_102185917(LOC102185917);ncbi_106502311(LOC106502311)	K02373+K05842+K00914+K03174+K06751+K04431+K04392+K07209+K03171+K06618+K04443+K06751+K05427
Genetic Information Processing	Transcription	Spliceosome	10	137	0.0122442	0.437467	ko03040	ncbi_100861007(CDC5L);ncbi_100861023(RBM17);ncbi_102168897(SNU13);ncbi_102170158(CRNKL1);ncbi_102172962(SF3A3);ncbi_102175883(LSM6);ncbi_102178934(SRSF9);ncbi_102184487(RBM8A);ncbi_102186697(USP39);ncbi_102187281(PRPF38B)	K12860+K12840+K12845+K12869+K12827+K12625+K21123+K12876+K12847+K12850
Organismal Systems	Nervous system	Long-term depression	6	61	0.0128556	0.437467	ko04730	ncbi_100861165(IGF1R);ncbi_102168441(CACNA1A);ncbi_102178930(PLA2G4A);ncbi_102182753(PRKG1);ncbi_102185175(GNA12);ncbi_102188874(LOC102188874)	K05087+K04344+K16342+K07376+K04346+K04632
Metabolism	Amino acid metabolism	Lysine degradation	6	62	0.0138634	0.437467	ko00310	ncbi_102171636(PRDM2);ncbi_102173322(COLGALT2);ncbi_102183291(OGDH);ncbi_102185413(ASH1L);ncbi_102186471(WHSC1);ncbi_102189632(LOC102189632)	K11432+K11703+K00164+K06101+K11424+K11433
Environmental Information Processing	Signal transduction	Hedgehog signaling pathway	5	48	0.0179376	0.446604	ko04340	ncbi_102173331(SMURF2);ncbi_102180576(LOC102180576);ncbi_102185296(GRK3);ncbi_102187999(GPR161);ncbi_108636574(GAS1)	K04678+K08960+K00910+K08439+K06232
Human Diseases	Infectious diseases	Human papillomavirus infection	20	379	0.018761	0.446604	ko05165	ncbi_102169483(ATP6V1E2);ncbi_102170760(FADD);ncbi_102170774(TICAM1);ncbi_102171742(TRAF3);ncbi_102172138(LOC102172138);ncbi_102177162(ATP6V1G1);ncbi_102177406(IKBKB);ncbi_102178669(COL6A5);ncbi_102178670(MAGI1);ncbi_102180248(TRADD);ncbi_102181952(PPP2R2A);ncbi_102182878(PPP2R5E);ncbi_102182879(PSEN1);ncbi_102182916(PPP2R3C);ncbi_102183886(RB1);ncbi_102185075(RBPJ);ncbi_102185917(LOC102185917);n…	K02150+K02373+K05842+K03174+K06751+K02152+K07209+K06238+K05631+K03171+K04354+K11584+K04505+K11583+K06618+K06053+K06751+K04354+K04632+K06090
Cellular Processes	Transport and catabolism	Endocytosis	15	259	0.0188706	0.446604	ko04144	ncbi_100861165(IGF1R);ncbi_102168683(EPS15);ncbi_102170194(NEDD4L);ncbi_102170622(ARFGAP2);ncbi_102172138(LOC102172138);ncbi_102173331(SMURF2);ncbi_102179498(ARAP1);ncbi_102180436(PDCD6IP);ncbi_102180871(GIT2);ncbi_102184658(CHMP6);ncbi_102185296(GRK3);ncbi_102185917(LOC102185917);ncbi_102190578(GRK5);ncbi_102191456(CLTC);ncbi_108633353(RBSN)	K05087+K12472+K13305+K12493+K06751+K04678+K18439+K12200+K12487+K12195+K00910+K06751+K08291+K04646+K12481
Organismal Systems	Immune system	Toll-like receptor signaling pathway	8	110	0.0243167	0.531227	ko04620	ncbi_100860844(TLR5);ncbi_102170760(FADD);ncbi_102170774(TICAM1);ncbi_102171575(IRAK4);ncbi_102171742(TRAF3);ncbi_102173178(MAP2K7);ncbi_102173438(RAC1);ncbi_102177406(IKBKB)	K10168+K02373+K05842+K04733+K03174+K04431+K04392+K07209
Cellular Processes	Cellular community - eukaryotes	Tight junction	11	181	0.030407	0.563325	ko04530	ncbi_102168557(RDX);ncbi_102169928(PRKAB2);ncbi_102170194(NEDD4L);ncbi_102173178(MAP2K7);ncbi_102173438(RAC1);ncbi_102178670(MAGI1);ncbi_102179429(TJAP1);ncbi_102181781(EZR);ncbi_102181952(PPP2R2A);ncbi_102188298(PPP2R2C);ncbi_102189115(CRB3)	K05762+K07199+K13305+K04431+K04392+K05631+K06105+K08007+K04354+K04354+K06090
Organismal Systems	Endocrine system	Ovarian Steroidogenesis	5	55	0.0304754	0.563325	ko04913	ncbi_100861165(IGF1R);ncbi_102168996(INSR);ncbi_102169557(ADCY6);ncbi_102178930(PLA2G4A);ncbi_102188874(LOC102188874)	K05087+K04527+K08046+K16342+K04632
Genetic Information Processing	Replication and repair	Mismatch repair	3	22	0.0317366	0.563325	ko03430	ncbi_102173474(MSH6);ncbi_102181726(MLH1);ncbi_102186980(POLD3)	K08737+K08734+K03504
Human Diseases	Cancers	Viral carcinogenesis	12	211	0.0379457	0.568113	ko05203	ncbi_100861324(GTF2H4);ncbi_102171742(TRAF3);ncbi_102172138(LOC102172138);ncbi_102173438(RAC1);ncbi_102175063(PMAIP1);ncbi_102180248(TRADD);ncbi_102183886(RB1);ncbi_102184079(MAPKAPK2);ncbi_102185075(RBPJ);ncbi_102185917(LOC102185917);ncbi_102188997(USP7);ncbi_102191773(GTF2H1)	K03144+K03174+K06751+K04392+K10131+K03171+K06618+K04443+K06053+K06751+K11838+K03141
Environmental Information Processing	Signal transduction	Sphingolipid signaling pathway	8	120	0.0381154	0.568113	ko04071	ncbi_102173438(RAC1);ncbi_102177770(ABCC1);ncbi_102180248(TRADD);ncbi_102181952(PPP2R2A);ncbi_102182878(PPP2R5E);ncbi_102182916(PPP2R3C);ncbi_102185175(GNA12);ncbi_102188298(PPP2R2C)	K04392+K05665+K03171+K04354+K11584+K11583+K04346+K04354
Metabolism	Lipid metabolism	Biosynthesis of unsaturated fatty acids	3	24	0.0398171	0.568113	ko01040	ncbi_102177788(ACOX3);ncbi_102178247(FADS1);ncbi_102190073(HACD2)	K00232+K10224+K10703
Human Diseases	Infectious diseases	Epstein-Barr virus infection	12	215	0.0428117	0.568113	ko05169	ncbi_102171742(TRAF3);ncbi_102172138(LOC102172138);ncbi_102173178(MAP2K7);ncbi_102174167(POLR2D);ncbi_102177406(IKBKB);ncbi_102180248(TRADD);ncbi_102180664(LOC102180664);ncbi_102183886(RB1);ncbi_102185075(RBPJ);ncbi_102185917(LOC102185917);ncbi_102188997(USP7);ncbi_102190767(POLR3H)	K03174+K06751+K04431+K03012+K07209+K03171+K06752+K06618+K06053+K06751+K11838+K03022
Human Diseases	Cancers	MicroRNAs in cancer	10	169	0.0442804	0.568113	ko05206	ncbi_102168557(RDX);ncbi_102171383(FOXP1);ncbi_102175206(CRKL);ncbi_102177406(IKBKB);ncbi_102177770(ABCC1);ncbi_102179773(SHC4);ncbi_102181186(MET);ncbi_102181781(EZR);ncbi_102190273(ZEB2);ncbi_108633488(SOX4)	K05762+K09409+K04438+K07209+K05665+K17449+K05099+K08007+K09299+K09268
Environmental Information Processing	Signal transduction	NF-kappa B signaling pathway	7	103	0.0464942	0.568113	ko04064	ncbi_102170774(TICAM1);ncbi_102170884(PRKCQ);ncbi_102171575(IRAK4);ncbi_102171742(TRAF3);ncbi_102177406(IKBKB);ncbi_102180248(TRADD);ncbi_102188317(GADD45G)	K05842+K18052+K04733+K03174+K07209+K03171+K04402
Environmental Information Processing	Signal transduction	Phospholipase D signaling pathway	9	149	0.0491579	0.568113	ko04072	ncbi_102168996(INSR);ncbi_102169557(ADCY6);ncbi_102170580(AGPAT5);ncbi_102178930(PLA2G4A);ncbi_102179773(SHC4);ncbi_102183611(LPAR6);ncbi_102185175(GNA12);ncbi_102188874(LOC102188874);ncbi_102189399(LPAR1)	K04527+K08046+K19007+K16342+K17449+K04273+K04346+K04632+K04289
Genetic Information Processing	Translation	Ribosome biogenesis in eukaryotes	6	83	0.0492048	0.568113	ko03008	ncbi_102168897(SNU13);ncbi_102169710(PWP2);ncbi_102177017(RPP40);ncbi_102180940(RCL1);ncbi_102182945(BMS1);ncbi_102186802(AK6)	K12845+K14558+K14530+K11108+K14569+K18532
Genetic Information Processing	Replication and repair	Nucleotide excision repair	4	44	0.0510243	0.568113	ko03420	ncbi_100861324(GTF2H4);ncbi_102175824(ERCC4);ncbi_102186980(POLD3);ncbi_102191773(GTF2H1)	K03144+K10848+K03504+K03141
Environmental Information Processing	Signal transduction	AMPK signaling pathway	8	128	0.0523585	0.568113	ko04152	ncbi_100861165(IGF1R);ncbi_102168996(INSR);ncbi_102169928(PRKAB2);ncbi_102173732(ELAVL1);ncbi_102181952(PPP2R2A);ncbi_102182878(PPP2R5E);ncbi_102182916(PPP2R3C);ncbi_102188298(PPP2R2C)	K05087+K04527+K07199+K13088+K04354+K11584+K11583+K04354
Organismal Systems	Immune system	Toll and Imd signaling pathway	4	45	0.0546537	0.568113	ko04624	ncbi_102170760(FADD);ncbi_102171575(IRAK4);ncbi_102173178(MAP2K7);ncbi_102177406(IKBKB)	K02373+K04733+K04431+K07209
Metabolism	Carbohydrate metabolism	Citrate cycle (TCA cycle)	3	30	0.0695472	0.568113	ko00020	ncbi_102179922(PC);ncbi_102183291(OGDH);ncbi_102190495(ACO2)	K01958+K00164+K01681
Genetic Information Processing	Transcription	RNA polymerase	3	30	0.0695472	0.568113	ko03020	ncbi_102174167(POLR2D);ncbi_102176969(POLR1B);ncbi_102190767(POLR3H)	K03012+K03002+K03022
Human Diseases	Endocrine and metabolic diseases	Insulin resistance	7	114	0.0723175	0.568113	ko04931	ncbi_100860906(NR1H3);ncbi_102168996(INSR);ncbi_102169928(PRKAB2);ncbi_102170884(PRKCQ);ncbi_102176299(PPP1R3B);ncbi_102177406(IKBKB);ncbi_108637008(PPP1R3E)	K08536+K04527+K07199+K18052+K07189+K07209+K07189
Human Diseases	Infectious diseases	Chagas disease (American trypanosomiasis)	7	114	0.0723175	0.568113	ko05142	ncbi_102170760(FADD);ncbi_102170774(TICAM1);ncbi_102171575(IRAK4);ncbi_102177406(IKBKB);ncbi_102181952(PPP2R2A);ncbi_102188298(PPP2R2C);ncbi_102188874(LOC102188874)	K02373+K05842+K04733+K07209+K04354+K04354+K04632
Human Diseases	Cardiovascular diseases	Viral myocarditis	5	70	0.0725747	0.568113	ko05416	ncbi_102172138(LOC102172138);ncbi_102173438(RAC1);ncbi_102180664(LOC102180664);ncbi_102180699(CXADR);ncbi_102185917(LOC102185917)	K06751+K04392+K06752+K06788+K06751
Environmental Information Processing	Signal transduction	Rap1 signaling pathway	11	210	0.07346	0.568113	ko04015	ncbi_100861165(IGF1R);ncbi_102168996(INSR);ncbi_102169557(ADCY6);ncbi_102173438(RAC1);ncbi_102175206(CRKL);ncbi_102176334(RAPGEF1);ncbi_102178670(MAGI1);ncbi_102181186(MET);ncbi_102188874(LOC102188874);ncbi_102189399(LPAR1);ncbi_102189773(ANGPT1)	K05087+K04527+K08046+K04392+K04438+K06277+K05631+K05099+K04632+K04289+K05465
Organismal Systems	Immune system	IL-17 signaling pathway	6	92	0.0737012	0.568113	ko04657	ncbi_102170760(FADD);ncbi_102171742(TRAF3);ncbi_102173732(ELAVL1);ncbi_102177406(IKBKB);ncbi_102180248(TRADD);ncbi_106502311(LOC106502311)	K02373+K03174+K13088+K07209+K03171+K05427
Genetic Information Processing	Translation	mRNA surveillance pathway	6	93	0.0767865	0.568113	ko03015	ncbi_102177177(CPSF1);ncbi_102181952(PPP2R2A);ncbi_102182878(PPP2R5E);ncbi_102182916(PPP2R3C);ncbi_102184487(RBM8A);ncbi_102188298(PPP2R2C)	K14401+K04354+K11584+K11583+K12876+K04354
Organismal Systems	Circulatory system	Vascular smooth muscle contraction	8	139	0.0769369	0.568113	ko04270	ncbi_102169557(ADCY6);ncbi_102170884(PRKCQ);ncbi_102178930(PLA2G4A);ncbi_102181773(PPP1R12B);ncbi_102182753(PRKG1);ncbi_102185175(GNA12);ncbi_102188874(LOC102188874);ncbi_102191486(ACTA2)	K08046+K18052+K16342+K12329+K07376+K04346+K04632+K12313
Metabolism	Global and overview maps	Fatty acid metabolism	4	51	0.0792491	0.568113	ko01212	ncbi_100861103(OXSM);ncbi_102177788(ACOX3);ncbi_102178247(FADS1);ncbi_102190073(HACD2)	K09458+K00232+K10224+K10703
Human Diseases	Immune diseases	Rheumatoid arthritis	6	94	0.079944	0.568113	ko05323	ncbi_102169483(ATP6V1E2);ncbi_102177162(ATP6V1G1);ncbi_102180664(LOC102180664);ncbi_102180957(IL15);ncbi_102189773(ANGPT1);ncbi_106502311(LOC106502311)	K02150+K02152+K06752+K05433+K05465+K05427
Human Diseases	Infectious diseases	Epithelial cell signaling in Helicobacter pylori infection	5	73	0.0835507	0.568113	ko05120	ncbi_102169483(ATP6V1E2);ncbi_102173438(RAC1);ncbi_102177162(ATP6V1G1);ncbi_102177406(IKBKB);ncbi_102181186(MET)	K02150+K04392+K02152+K07209+K05099
Environmental Information Processing	Signal transduction	Hedgehog signaling pathway - fly	3	33	0.087262	0.568113	ko04341	ncbi_102173331(SMURF2);ncbi_102180576(LOC102180576);ncbi_102190578(GRK5)	K04678+K08960+K08291
Organismal Systems	Environmental adaptation	Circadian rhythm	3	33	0.087262	0.568113	ko04710	ncbi_102169928(PRKAB2);ncbi_102176826(NR1D1);ncbi_102180576(LOC102180576)	K07199+K03728+K08960
Genetic Information Processing	Folding, sorting and degradation	Protein processing in endoplasmic reticulum	9	168	0.0893712	0.568113	ko04141	ncbi_100860963(DAD1);ncbi_102170514(PLAA);ncbi_102172345(DNAJB1);ncbi_102173178(MAP2K7);ncbi_102176523(SEC24A);ncbi_102180702(SEC62);ncbi_102183994(MBTPS1);ncbi_102186635(SEC23A);ncbi_102190380(PDIA4)	K12668+K14018+K09507+K04431+K14007+K12275+K08653+K14006+K09582
Organismal Systems	Endocrine system	Insulin signaling pathway	8	144	0.0900679	0.568113	ko04910	ncbi_102168996(INSR);ncbi_102169928(PRKAB2);ncbi_102175206(CRKL);ncbi_102176299(PPP1R3B);ncbi_102176334(RAPGEF1);ncbi_102177406(IKBKB);ncbi_102179773(SHC4);ncbi_108637008(PPP1R3E)	K04527+K07199+K04438+K07189+K06277+K07209+K17449+K07189
Genetic Information Processing	Folding, sorting and degradation	Ubiquitin mediated proteolysis	8	145	0.092841	0.568113	ko04120	ncbi_102170194(NEDD4L);ncbi_102170786(CDC26);ncbi_102173331(SMURF2);ncbi_102173916(LOC102173916);ncbi_102181564(HERC4);ncbi_102183223(ANAPC4);ncbi_102183282(NHLRC1);ncbi_102190957(RHOBTB2)	K13305+K03359+K04678+K20217+K10615+K03351+K10602+K07868
Metabolism	Metabolism of cofactors and vitamins	Biotin metabolism	1	3	0.0928689	0.568113	ko00780	ncbi_100861103(OXSM)	K09458
Human Diseases	Infectious diseases	HTLV-I infection	13	271	0.0939867	0.568113	ko05166	ncbi_100861366(KAT5);ncbi_102169557(ADCY6);ncbi_102170786(CDC26);ncbi_102172138(LOC102172138);ncbi_102177406(IKBKB);ncbi_102180664(LOC102180664);ncbi_102180957(IL15);ncbi_102183223(ANAPC4);ncbi_102183886(RB1);ncbi_102185917(LOC102185917);ncbi_102186980(POLD3);ncbi_106502271(CRTC1);ncbi_106502311(LOC106502311)	K11304+K08046+K03359+K06751+K07209+K06752+K05433+K03351+K06618+K06751+K03504+K15309+K05427
Human Diseases	Infectious diseases	Vibrio cholerae infection	4	55	0.0982189	0.568113	ko05110	ncbi_102169483(ATP6V1E2);ncbi_102177162(ATP6V1G1);ncbi_102188874(LOC102188874);ncbi_102190380(PDIA4)	K02150+K02152+K04632+K09582
Human Diseases	Infectious diseases	Bacterial invasion of epithelial cells	5	77	0.0994671	0.568113	ko05100	ncbi_102173438(RAC1);ncbi_102175206(CRKL);ncbi_102179773(SHC4);ncbi_102181186(MET);ncbi_102191456(CLTC)	K04392+K04438+K17449+K05099+K04646
Genetic Information Processing	Replication and repair	DNA replication	3	35	0.10002	0.568113	ko03030	ncbi_102170032(RNASEH2C);ncbi_102175140(MCM4);ncbi_102186980(POLD3)	K10745+K02212+K03504
Cellular Processes	Cell growth and death	Apoptosis - multiple species	3	35	0.10002	0.568113	ko04215	ncbi_102170760(FADD);ncbi_102175063(PMAIP1);ncbi_102178560(DIABLO)	K02373+K10131+K10522
Metabolism	Metabolism of cofactors and vitamins	Thiamine metabolism	2	18	0.111392	0.599777	ko00730	ncbi_102177176(NFS1);ncbi_102182002(AK2)	K04487+K00939
Metabolism	Lipid metabolism	Glycerophospholipid metabolism	6	103	0.111553	0.599777	ko00564	ncbi_102169493(PTDSS1);ncbi_102170580(AGPAT5);ncbi_102178930(PLA2G4A);ncbi_102181908(LYPLA2);ncbi_102181988(ADPRM);ncbi_102182422(LYPLA1)	K08729+K19007+K16342+K06130+K01517+K06128
Cellular Processes	Cell growth and death	Cell cycle	7	127	0.11193	0.599777	ko04110	ncbi_102170786(CDC26);ncbi_102173029(ORC6);ncbi_102175140(MCM4);ncbi_102183223(ANAPC4);ncbi_102183886(RB1);ncbi_102188317(GADD45G);ncbi_102189610(CDC45)	K03359+K02608+K02212+K03351+K06618+K04402+K06628
Metabolism	Nucleotide metabolism	Purine metabolism	9	178	0.116617	0.603065	ko00230	ncbi_102169557(ADCY6);ncbi_102174167(POLR2D);ncbi_102174732(PGM2);ncbi_102176969(POLR1B);ncbi_102181988(ADPRM);ncbi_102182002(AK2);ncbi_102186802(AK6);ncbi_102186980(POLD3);ncbi_102190767(POLR3H)	K08046+K03012+K15779+K03002+K01517+K00939+K18532+K03504+K03022
Human Diseases	Cancers	Chronic myeloid leukemia	5	81	0.116791	0.603065	ko05220	ncbi_102175206(CRKL);ncbi_102177406(IKBKB);ncbi_102179773(SHC4);ncbi_102183886(RB1);ncbi_102188317(GADD45G)	K04438+K07209+K17449+K06618+K04402
Organismal Systems	Endocrine system	Regulation of lipolysis in adipocyte	4	59	0.119092	0.603966	ko04923	ncbi_102168996(INSR);ncbi_102169557(ADCY6);ncbi_102182753(PRKG1);ncbi_102188874(LOC102188874)	K04527+K08046+K07376+K04632
Human Diseases	Infectious diseases	Herpes simplex infection	10	206	0.123776	0.616237	ko05168	ncbi_102170760(FADD);ncbi_102170774(TICAM1);ncbi_102171742(TRAF3);ncbi_102172138(LOC102172138);ncbi_102177406(IKBKB);ncbi_102178934(SRSF9);ncbi_102180664(LOC102180664);ncbi_102180957(IL15);ncbi_102185917(LOC102185917);ncbi_102188997(USP7)	K02373+K05842+K03174+K06751+K07209+K21123+K06752+K05433+K06751+K11838
Environmental Information Processing	Signal transduction	FoxO signaling pathway	7	132	0.129709	0.616237	ko04068	ncbi_100861165(IGF1R);ncbi_102168996(INSR);ncbi_102169928(PRKAB2);ncbi_102177406(IKBKB);ncbi_102180576(LOC102180576);ncbi_102188317(GADD45G);ncbi_102188997(USP7)	K05087+K04527+K07199+K07209+K08960+K04402+K11838
Environmental Information Processing	Signal transduction	Hippo signaling pathway -fly	4	61	0.130191	0.616237	ko04391	ncbi_102170445(TEAD1);ncbi_102180576(LOC102180576);ncbi_102181952(PPP2R2A);ncbi_102188298(PPP2R2C)	K09448+K08960+K04354+K04354
Human Diseases	Endocrine and metabolic diseases	Type I diabetes mellitus	4	61	0.130191	0.616237	ko04940	ncbi_100861238(HSPD1);ncbi_102172138(LOC102172138);ncbi_102180664(LOC102180664);ncbi_102185917(LOC102185917)	K04077+K06751+K06752+K06751
Organismal Systems	Development	Axon guidance	9	185	0.138123	0.627501	ko04360	ncbi_102171324(SEMA6B);ncbi_102171364(LIMK2);ncbi_102173438(RAC1);ncbi_102174862(SRGAP2);ncbi_102175861(SEMA4C);ncbi_102181186(MET);ncbi_102183467(EPHA4);ncbi_102188857(SEMA4D);ncbi_102191321(LRRC4C)	K06842+K05744+K04392+K07526+K06521+K05099+K05105+K06521+K07523
Human Diseases	Infectious diseases	Hepatitis C	7	135	0.141017	0.627501	ko05160	ncbi_100860906(NR1H3);ncbi_102170774(TICAM1);ncbi_102171742(TRAF3);ncbi_102177406(IKBKB);ncbi_102180248(TRADD);ncbi_102181952(PPP2R2A);ncbi_102188298(PPP2R2C)	K08536+K05842+K03174+K07209+K03171+K04354+K04354
Genetic Information Processing	Replication and repair	Homologous recombination	3	41	0.142257	0.627501	ko03440	ncbi_102182342(EME1);ncbi_102186980(POLD3);ncbi_102189460(XRCC2)	K10882+K03504+K10879
Metabolism	Metabolism of terpenoids and polyketides	Terpenoid backbone biosynthesis	2	21	0.14382	0.627501	ko00900	ncbi_102169144(DHDDS);ncbi_102173744(NUS1)	K11778+K19177
Organismal Systems	Aging	Longevity regulating pathway - multiple species	4	64	0.147604	0.627501	ko04213	ncbi_100861165(IGF1R);ncbi_102168996(INSR);ncbi_102169557(ADCY6);ncbi_102169928(PRKAB2)	K05087+K04527+K08046+K07199
Organismal Systems	Nervous system	Synaptic vesicle cycle	4	64	0.147604	0.627501	ko04721	ncbi_102168441(CACNA1A);ncbi_102169483(ATP6V1E2);ncbi_102177162(ATP6V1G1);ncbi_102191456(CLTC)	K04344+K02150+K02152+K04646
Organismal Systems	Nervous system	Glutamatergic synapse	6	112	0.148595	0.627501	ko04724	ncbi_102168441(CACNA1A);ncbi_102169557(ADCY6);ncbi_102171308(SHANK2);ncbi_102178930(PLA2G4A);ncbi_102185296(GRK3);ncbi_102188874(LOC102188874)	K04344+K08046+K15009+K16342+K00910+K04632
Cellular Processes	Cellular community - eukaryotes	Gap junction	5	88	0.150247	0.627501	ko04540	ncbi_102169557(ADCY6);ncbi_102172952(LOC102172952);ncbi_102182753(PRKG1);ncbi_102188874(LOC102188874);ncbi_102189399(LPAR1)	K08046+K07375+K07376+K04632+K04289
Metabolism	Glycan biosynthesis and metabolism	Other types of O-glycan biosynthesis	2	22	0.155028	0.62941	ko00514	ncbi_102173322(COLGALT2);ncbi_102187411(B3GLCT)	K11703+K13675
Human Diseases	Infectious diseases	Human cytomegalovirus infection	11	243	0.155136	0.62941	ko05163	ncbi_102169557(ADCY6);ncbi_102170760(FADD);ncbi_102172138(LOC102172138);ncbi_102173438(RAC1);ncbi_102175206(CRKL);ncbi_102177406(IKBKB);ncbi_102180248(TRADD);ncbi_102183886(RB1);ncbi_102185175(GNA12);ncbi_102185917(LOC102185917);ncbi_102188874(LOC102188874)	K08046+K02373+K06751+K04392+K04438+K07209+K03171+K06618+K04346+K06751+K04632
Cellular Processes	Transport and catabolism	Phagosome	8	166	0.161938	0.647752	ko04145	ncbi_102169483(ATP6V1E2);ncbi_102171561(PIK3C3);ncbi_102172138(LOC102172138);ncbi_102172952(LOC102172952);ncbi_102173438(RAC1);ncbi_102177162(ATP6V1G1);ncbi_102180664(LOC102180664);ncbi_102185917(LOC102185917)	K02150+K00914+K06751+K07375+K04392+K02152+K06752+K06751
Genetic Information Processing	Transcription	Basal transcription factors	3	45	0.173161	0.65821	ko03022	ncbi_100861324(GTF2H4);ncbi_102191773(GTF2H1);ncbi_106501725(TAF9)	K03144+K03141+K14535
Genetic Information Processing	Folding, sorting and degradation	Proteasome	3	45	0.173161	0.65821	ko03050	ncbi_102173481(PSMF1);ncbi_102184096(PSMA4);ncbi_102186449(PSMA5)	K06700+K02728+K02729
Human Diseases	Cancers	Colorectal cancer	5	93	0.17634	0.65821	ko05210	ncbi_102173438(RAC1);ncbi_102173474(MSH6);ncbi_102175063(PMAIP1);ncbi_102181726(MLH1);ncbi_102188317(GADD45G)	K04392+K08737+K10131+K08734+K04402
Organismal Systems	Environmental adaptation	Circadian rhythm - fly	1	6	0.177143	0.65821	ko04711	ncbi_102180576(LOC102180576)	K08960
Metabolism	Glycan biosynthesis and metabolism	Glycosaminoglycan biosynthesis - heparan sulfate / heparin	2	24	0.177904	0.65821	ko00534	ncbi_102182243(EXT2);ncbi_102188252(XYLT2)	K02367+K00771
Organismal Systems	Immune system	Fc epsilon RI signaling pathway	4	69	0.178458	0.65821	ko04664	ncbi_102173178(MAP2K7);ncbi_102173438(RAC1);ncbi_102178930(PLA2G4A);ncbi_106502311(LOC106502311)	K04431+K04392+K16342+K05427
Human Diseases	Substance dependence	Morphine addiction	5	94	0.181755	0.661775	ko05032	ncbi_102168441(CACNA1A);ncbi_102169557(ADCY6);ncbi_102185296(GRK3);ncbi_102188874(LOC102188874);ncbi_102190578(GRK5)	K04344+K08046+K00910+K04632+K08291
Human Diseases	Cancers	Renal cell carcinoma	4	71	0.191367	0.675878	ko05211	ncbi_102173438(RAC1);ncbi_102175206(CRKL);ncbi_102176334(RAPGEF1);ncbi_102181186(MET)	K04392+K04438+K06277+K05099
Human Diseases	Cancers	Melanoma	4	71	0.191367	0.675878	ko05218	ncbi_100861165(IGF1R);ncbi_102181186(MET);ncbi_102183886(RB1);ncbi_102188317(GADD45G)	K05087+K05099+K06618+K04402
Human Diseases	Drug resistance	Endocrine resistance	5	96	0.192768	0.675878	ko01522	ncbi_100861165(IGF1R);ncbi_102169557(ADCY6);ncbi_102179773(SHC4);ncbi_102183886(RB1);ncbi_102188874(LOC102188874)	K05087+K08046+K17449+K06618+K04632
Human Diseases	Cancers	Glioma	4	72	0.19793	0.685514	ko05214	ncbi_100861165(IGF1R);ncbi_102179773(SHC4);ncbi_102183886(RB1);ncbi_102188317(GADD45G)	K05087+K17449+K06618+K04402
Metabolism	Nucleotide metabolism	Pyrimidine metabolism	5	98	0.204011	0.687602	ko00240	ncbi_102171294(DCTPP1);ncbi_102174167(POLR2D);ncbi_102176969(POLR1B);ncbi_102186980(POLD3);ncbi_102190767(POLR3H)	K16904+K03012+K03002+K03504+K03022
Human Diseases	Endocrine and metabolic diseases	Type II diabetes mellitus	3	49	0.205742	0.687602	ko04930	ncbi_102168441(CACNA1A);ncbi_102168996(INSR);ncbi_102177406(IKBKB)	K04344+K04527+K07209
Cellular Processes	Cellular community - eukaryotes	Adherens junction	4	74	0.211256	0.687602	ko04520	ncbi_100861165(IGF1R);ncbi_102168996(INSR);ncbi_102173438(RAC1);ncbi_102181186(MET)	K05087+K04527+K04392+K05099
Organismal Systems	Endocrine system	Thyroid hormone synthesis	4	74	0.211256	0.687602	ko04918	ncbi_102169557(ADCY6);ncbi_102172803(SLC5A5);ncbi_102188874(LOC102188874);ncbi_102190380(PDIA4)	K08046+K14385+K04632+K09582
Organismal Systems	Endocrine system	Adipocytokine signaling pathway	4	74	0.211256	0.687602	ko04920	ncbi_102169928(PRKAB2);ncbi_102170884(PRKCQ);ncbi_102177406(IKBKB);ncbi_102180248(TRADD)	K07199+K18052+K07209+K03171
Organismal Systems	Excretory system	Collecting duct acid secretion	2	27	0.21306	0.687602	ko04966	ncbi_102169483(ATP6V1E2);ncbi_102177162(ATP6V1G1)	K02150+K02152
Organismal Systems	Circulatory system	Adrenergic signaling in cardiomyocytes	7	153	0.217831	0.695102	ko04261	ncbi_102169557(ADCY6);ncbi_102170148(PLN);ncbi_102181952(PPP2R2A);ncbi_102182878(PPP2R5E);ncbi_102182916(PPP2R3C);ncbi_102188298(PPP2R2C);ncbi_102188874(LOC102188874)	K08046+K05852+K04354+K11584+K11583+K04354+K04632
Metabolism	Glycan biosynthesis and metabolism	Glycosphingolipid biosynthesis - lacto and neolacto series	2	28	0.224929	0.701977	ko00601	ncbi_102168846(B3GNT4);ncbi_108637190(FUT7)	K07971+K07635
Environmental Information Processing	Signal transduction	Hippo signaling pathway - multiple species	2	28	0.224929	0.701977	ko04392	ncbi_102170445(TEAD1);ncbi_102180576(LOC102180576)	K09448+K08960
Human Diseases	Cancers	Pancreatic cancer	4	78	0.238616	0.702266	ko05212	ncbi_102173438(RAC1);ncbi_102177406(IKBKB);ncbi_102183886(RB1);ncbi_102188317(GADD45G)	K04392+K07209+K06618+K04402
Organismal Systems	Immune system	T cell receptor signaling pathway	5	104	0.238957	0.702266	ko04660	ncbi_102170884(PRKCQ);ncbi_102173178(MAP2K7);ncbi_102177406(IKBKB);ncbi_102188484(TEC);ncbi_106502311(LOC106502311)	K18052+K04431+K07209+K07364+K05427
Human Diseases	Infectious diseases	Tuberculosis	8	185	0.240003	0.702266	ko05152	ncbi_100861238(HSPD1);ncbi_102170760(FADD);ncbi_102171561(PIK3C3);ncbi_102171575(IRAK4);ncbi_102177433(CEBPG);ncbi_102180248(TRADD);ncbi_102180664(LOC102180664);ncbi_102180910(ITGAX)	K04077+K02373+K00914+K04733+K10049+K03171+K06752+K06462
Environmental Information Processing	Signal transduction	PI3K-Akt signaling pathway	15	382	0.240464	0.702266	ko04151	ncbi_100861165(IGF1R);ncbi_102168996(INSR);ncbi_102173438(RAC1);ncbi_102177406(IKBKB);ncbi_102178669(COL6A5);ncbi_102178670(MAGI1);ncbi_102181186(MET);ncbi_102181952(PPP2R2A);ncbi_102182878(PPP2R5E);ncbi_102182916(PPP2R3C);ncbi_102183611(LPAR6);ncbi_102184003(OSMR);ncbi_102188298(PPP2R2C);ncbi_102189399(LPAR1);ncbi_102189773(ANGPT1)	K05087+K04527+K04392+K07209+K06238+K05631+K05099+K04354+K11584+K11583+K04273+K05057+K04354+K04289+K05465
Cellular Processes	Cell growth and death	Apoptosis	7	158	0.241473	0.702266	ko04210	ncbi_102170760(FADD);ncbi_102175063(PMAIP1);ncbi_102177406(IKBKB);ncbi_102178560(DIABLO);ncbi_102180248(TRADD);ncbi_102188317(GADD45G);ncbi_102190798(DAB2IP)	K02373+K10131+K07209+K10522+K03171+K04402+K19901
Environmental Information Processing	Signal transduction	mTOR signaling pathway	7	159	0.246299	0.702266	ko04150	ncbi_100861165(IGF1R);ncbi_102168996(INSR);ncbi_102169483(ATP6V1E2);ncbi_102171835(RRAGC);ncbi_102172180(DEPDC5);ncbi_102177162(ATP6V1G1);ncbi_102177406(IKBKB)	K05087+K04527+K02150+K16186+K20404+K02152+K07209
Genetic Information Processing	Replication and repair	Fanconi anemia pathway	3	54	0.248177	0.702266	ko03460	ncbi_102175824(ERCC4);ncbi_102181726(MLH1);ncbi_102182342(EME1)	K10848+K08734+K10882
Human Diseases	Immune diseases	Allograft rejection	3	54	0.248177	0.702266	ko05330	ncbi_102172138(LOC102172138);ncbi_102180664(LOC102180664);ncbi_102185917(LOC102185917)	K06751+K06752+K06751
Metabolism	Lipid metabolism	alpha-Linolenic acid metabolism	2	30	0.248796	0.702266	ko00592	ncbi_102177788(ACOX3);ncbi_102178930(PLA2G4A)	K00232+K16342
Cellular Processes	Cellular community - eukaryotes	Focal adhesion	9	217	0.258442	0.702266	ko04510	ncbi_100861165(IGF1R);ncbi_102173438(RAC1);ncbi_102175206(CRKL);ncbi_102176334(RAPGEF1);ncbi_102178669(COL6A5);ncbi_102179773(SHC4);ncbi_102181186(MET);ncbi_102181773(PPP1R12B);ncbi_102187630(FLNB)	K05087+K04392+K04438+K06277+K06238+K17449+K05099+K12329+K04437
Human Diseases	Drug resistance	Platinum drug resistance	4	81	0.259653	0.702266	ko01524	ncbi_102170760(FADD);ncbi_102173474(MSH6);ncbi_102175063(PMAIP1);ncbi_102181726(MLH1)	K02373+K08737+K10131+K08734
Organismal Systems	Nervous system	Dopaminergic synapse	6	135	0.262964	0.702266	ko04728	ncbi_102168441(CACNA1A);ncbi_102181952(PPP2R2A);ncbi_102182878(PPP2R5E);ncbi_102182916(PPP2R3C);ncbi_102188298(PPP2R2C);ncbi_102188874(LOC102188874)	K04344+K04354+K11584+K11583+K04354+K04632
Organismal Systems	Immune system	RIG-I-like receptor signaling pathway	5	108	0.26311	0.702266	ko04622	ncbi_102170760(FADD);ncbi_102171742(TRAF3);ncbi_102174516(AZI2);ncbi_102177406(IKBKB);ncbi_102180248(TRADD)	K02373+K03174+K12651+K07209+K03171
Organismal Systems	Excretory system	Endocrine and other factor-regulated calcium reabsorption	3	56	0.265521	0.702266	ko04961	ncbi_102169557(ADCY6);ncbi_102188874(LOC102188874);ncbi_102191456(CLTC)	K08046+K04632+K04646
Human Diseases	Drug resistance	EGFR tyrosine kinase inhibitor resistance	4	82	0.266746	0.702266	ko01521	ncbi_100861165(IGF1R);ncbi_102179773(SHC4);ncbi_102181186(MET);ncbi_102183001(NF1)	K05087+K17449+K05099+K08052
Cellular Processes	Transport and catabolism	Peroxisome	4	82	0.266746	0.702266	ko04146	ncbi_102176143(PEX2);ncbi_102177788(ACOX3);ncbi_102180132(MPV17);ncbi_106503123(NUDT19)	K06664+K00232+K13348+K13355
Human Diseases	Cancers	Pathways in cancer	20	538	0.272108	0.702266	ko05200	ncbi_100861165(IGF1R);ncbi_102169302(NCOA1);ncbi_102169557(ADCY6);ncbi_102170760(FADD);ncbi_102171742(TRAF3);ncbi_102173438(RAC1);ncbi_102173474(MSH6);ncbi_102175063(PMAIP1);ncbi_102175206(CRKL);ncbi_102177406(IKBKB);ncbi_102180957(IL15);ncbi_102181186(MET);ncbi_102181726(MLH1);ncbi_102182855(TXNRD1);ncbi_102183611(LPAR6);ncbi_102183886(RB1);ncbi_102185175(GNA12);ncbi_102188317(GADD45G);ncbi_1021…	K05087+K09101+K08046+K02373+K03174+K04392+K08737+K10131+K04438+K07209+K05433+K05099+K08734+K22182+K04273+K06618+K04346+K04402+K04632+K04289
Cellular Processes	Transport and catabolism	Lysosome	6	137	0.273892	0.702266	ko04142	ncbi_102170679(NAGA);ncbi_102179363(GGA1);ncbi_102179566(FUCA2);ncbi_102184070(CLN5);ncbi_102190935(LOC102190935);ncbi_102191456(CLTC)	K01204+K12404+K01206+K12390+K21398+K04646
Cellular Processes	Transport and catabolism	Autophagy - animal	6	138	0.279396	0.702266	ko04140	ncbi_100861165(IGF1R);ncbi_102170884(PRKCQ);ncbi_102171561(PIK3C3);ncbi_102171835(RRAGC);ncbi_102174392(STX17);ncbi_102176208(IGBP1)	K05087+K18052+K00914+K16186+K08491+K17606
Cellular Processes	Cell growth and death	Cellular senescence	7	166	0.280866	0.702266	ko04218	ncbi_102172138(LOC102172138);ncbi_102176694(ZFP36L1);ncbi_102177957(HIPK2);ncbi_102183886(RB1);ncbi_102184079(MAPKAPK2);ncbi_102185917(LOC102185917);ncbi_102188317(GADD45G)	K06751+K18753+K08826+K06618+K04443+K06751+K04402
Human Diseases	Immune diseases	Graft-versus-host disease	3	58	0.283005	0.702266	ko05332	ncbi_102172138(LOC102172138);ncbi_102180664(LOC102180664);ncbi_102185917(LOC102185917)	K06751+K06752+K06751
Cellular Processes	Cell motility	Regulation of actin cytoskeleton	9	224	0.288504	0.702266	ko04810	ncbi_102168557(RDX);ncbi_102171364(LIMK2);ncbi_102173438(RAC1);ncbi_102175206(CRKL);ncbi_102180910(ITGAX);ncbi_102181773(PPP1R12B);ncbi_102181781(EZR);ncbi_102185175(GNA12);ncbi_102189399(LPAR1)	K05762+K05744+K04392+K04438+K06462+K12329+K08007+K04346+K04289
Human Diseases	Cancers	Transcriptional misregulation in cancers	8	196	0.290143	0.702266	ko05202	ncbi_100861165(IGF1R);ncbi_102173725(PROM1);ncbi_102181186(MET);ncbi_102186290(BMP2K);ncbi_102186471(WHSC1);ncbi_102188317(GADD45G);ncbi_102190273(ZEB2);ncbi_106502311(LOC106502311)	K05087+K06532+K05099+K08854+K11424+K04402+K09299+K05427
Genetic Information Processing	Translation	RNA transport	7	168	0.290964	0.702266	ko03013	ncbi_102168397(THOC7);ncbi_102169754(GEMIN7);ncbi_102171314(NUP50);ncbi_102173559(GEMIN5);ncbi_102177017(RPP40);ncbi_102178080(EIF5B);ncbi_102184487(RBM8A)	K13176+K13135+K14295+K13133+K14530+K03243+K12876
Human Diseases	Drug resistance	Antifolate resistance	3	59	0.291786	0.702266	ko01523	ncbi_102177406(IKBKB);ncbi_102177770(ABCC1);ncbi_102186159(ABCC5)	K07209+K05665+K05668
Environmental Information Processing	Signal transduction	VEGF signaling pathway	3	59	0.291786	0.702266	ko04370	ncbi_102173438(RAC1);ncbi_102178930(PLA2G4A);ncbi_102184079(MAPKAPK2)	K04392+K16342+K04443
Human Diseases	Infectious diseases	Legionellosis	3	59	0.291786	0.702266	ko05134	ncbi_100860844(TLR5);ncbi_100861238(HSPD1);ncbi_102175373(BCL2L13)	K10168+K04077+K15485
Organismal Systems	Immune system	NOD-like receptor signaling pathway	7	169	0.296044	0.706526	ko04621	ncbi_102170760(FADD);ncbi_102170774(TICAM1);ncbi_102171575(IRAK4);ncbi_102171742(TRAF3);ncbi_102177406(IKBKB);ncbi_102180018(DNM1L);ncbi_102185184(RIPK3)	K02373+K05842+K04733+K03174+K07209+K17065+K08847
Environmental Information Processing	Signal transduction	TGF-beta signaling pathway	4	87	0.30268	0.716342	ko04350	ncbi_102173331(SMURF2);ncbi_102175820(TGIF1);ncbi_102176275(ACVR2B);ncbi_102185881(ID3)	K04678+K19383+K13596+K17694
Organismal Systems	Immune system	Th1 and Th2 cell differentiation	4	88	0.309939	0.727459	ko04658	ncbi_102170884(PRKCQ);ncbi_102177406(IKBKB);ncbi_102180664(LOC102180664);ncbi_102185075(RBPJ)	K18052+K07209+K06752+K06053
Organismal Systems	Sensory system	Inflammatory mediator regulation of TRP channels	5	116	0.312886	0.728358	ko04750	ncbi_102169557(ADCY6);ncbi_102170884(PRKCQ);ncbi_102178930(PLA2G4A);ncbi_102187771(F2RL1);ncbi_102188874(LOC102188874)	K08046+K18052+K16342+K04234+K04632
Organismal Systems	Aging	Longevity regulating pathway - mammal	4	91	0.331806	0.73723	ko04211	ncbi_100861165(IGF1R);ncbi_102168996(INSR);ncbi_102169557(ADCY6);ncbi_102169928(PRKAB2)	K05087+K04527+K08046+K07199
Organismal Systems	Endocrine system	GnRH signaling pathway	4	91	0.331806	0.73723	ko04912	ncbi_102169557(ADCY6);ncbi_102173178(MAP2K7);ncbi_102178930(PLA2G4A);ncbi_102188874(LOC102188874)	K08046+K04431+K16342+K04632
Organismal Systems	Endocrine system	Progesterone-mediated oocyte maturation	4	91	0.331806	0.73723	ko04914	ncbi_100861165(IGF1R);ncbi_102169557(ADCY6);ncbi_102170786(CDC26);ncbi_102183223(ANAPC4)	K05087+K08046+K03359+K03351
Cellular Processes	Cell growth and death	Oocyte meiosis	5	119	0.331894	0.73723	ko04114	ncbi_100861165(IGF1R);ncbi_102169557(ADCY6);ncbi_102170786(CDC26);ncbi_102182878(PPP2R5E);ncbi_102183223(ANAPC4)	K05087+K08046+K03359+K11584+K03351
Human Diseases	Cancers	Prostate cancer	5	119	0.331894	0.73723	ko05215	ncbi_100861165(IGF1R);ncbi_102177406(IKBKB);ncbi_102183886(RB1);ncbi_102187232(SRD5A2);ncbi_102190273(ZEB2)	K05087+K07209+K06618+K12344+K09299
Cellular Processes	Transport and catabolism	Autophagy - other eukaryotes	2	37	0.332273	0.73723	ko04136	ncbi_102171561(PIK3C3);ncbi_102176208(IGBP1)	K00914+K17606
Organismal Systems	Immune system	Cytosolic DNA-sensing pathway	3	64	0.335873	0.739442	ko04623	ncbi_102177406(IKBKB);ncbi_102185184(RIPK3);ncbi_102190767(POLR3H)	K07209+K08847+K03022
Cellular Processes	Cell growth and death	Necroptosis	7	178	0.342527	0.74829	ko04217	ncbi_102170760(FADD);ncbi_102170774(TICAM1);ncbi_102178930(PLA2G4A);ncbi_102180018(DNM1L);ncbi_102180248(TRADD);ncbi_102184658(CHMP6);ncbi_102185184(RIPK3)	K02373+K05842+K16342+K17065+K03171+K12195+K08847
Environmental Information Processing	Signal transduction	Ras signaling pathway	9	237	0.346492	0.751174	ko04014	ncbi_100861165(IGF1R);ncbi_102168996(INSR);ncbi_102173438(RAC1);ncbi_102177406(IKBKB);ncbi_102178930(PLA2G4A);ncbi_102179773(SHC4);ncbi_102181186(MET);ncbi_102183001(NF1);ncbi_102189773(ANGPT1)	K05087+K04527+K04392+K07209+K16342+K17449+K05099+K08052+K05465
Human Diseases	Immune diseases	Autoimmune thyroid disease	3	66	0.353503	0.760566	ko05320	ncbi_102172138(LOC102172138);ncbi_102180664(LOC102180664);ncbi_102185917(LOC102185917)	K06751+K06752+K06751
Organismal Systems	Immune system	Chemokine signaling pathway	7	182	0.363499	0.772636	ko04062	ncbi_102169557(ADCY6);ncbi_102173438(RAC1);ncbi_102175206(CRKL);ncbi_102177406(IKBKB);ncbi_102179773(SHC4);ncbi_102185296(GRK3);ncbi_102190578(GRK5)	K08046+K04392+K04438+K07209+K17449+K00910+K08291
Metabolism	Lipid metabolism	Fatty acid biosynthesis	1	14	0.365652	0.772636	ko00061	ncbi_100861103(OXSM)	K09458
Organismal Systems	Excretory system	Aldosterone-regulated sodium reabsorption	2	40	0.367368	0.772636	ko04960	ncbi_102168996(INSR);ncbi_102170194(NEDD4L)	K04527+K13305
Environmental Information Processing	Signaling molecules and interaction	Cell adhesion molecules (CAMs)	6	154	0.369995	0.772636	ko04514	ncbi_102172138(LOC102172138);ncbi_102176887(CD276);ncbi_102180664(LOC102180664);ncbi_102185917(LOC102185917);ncbi_102186933(CNTN1);ncbi_102191321(LRRC4C)	K06751+K06746+K06752+K06751+K06759+K07523
Human Diseases	Infectious diseases	Influenza A	7	186	0.384571	0.791757	ko05164	ncbi_102170774(TICAM1);ncbi_102171575(IRAK4);ncbi_102172345(DNAJB1);ncbi_102173178(MAP2K7);ncbi_102177406(IKBKB);ncbi_102180664(LOC102180664);ncbi_102187165(KPNA1)	K05842+K04733+K09507+K04431+K07209+K06752+K15042
Organismal Systems	Development	Osteoclast differentiation	5	128	0.389362	0.791757	ko04380	ncbi_102171522(FOSL2);ncbi_102173178(MAP2K7);ncbi_102173438(RAC1);ncbi_102177406(IKBKB);ncbi_102188484(TEC)	K09030+K04431+K04392+K07209+K07364
Organismal Systems	Immune system	Fc gamma R-mediated phagocytosis	4	99	0.390303	0.791757	ko04666	ncbi_102171364(LIMK2);ncbi_102173438(RAC1);ncbi_102175206(CRKL);ncbi_102178930(PLA2G4A)	K05744+K04392+K04438+K16342
Human Diseases	Cancers	Small cell lung cancer	4	99	0.390303	0.791757	ko05222	ncbi_102171742(TRAF3);ncbi_102177406(IKBKB);ncbi_102183886(RB1);ncbi_102188317(GADD45G)	K03174+K07209+K06618+K04402
Human Diseases	Infectious diseases	Salmonella infection	4	100	0.397588	0.800815	ko05132	ncbi_100860844(TLR5);ncbi_102173438(RAC1);ncbi_102187630(FLNB);ncbi_106502311(LOC106502311)	K10168+K04392+K04437+K05427
Metabolism	Metabolism of other amino acids	Selenocompound metabolism	1	16	0.405624	0.806176	ko00450	ncbi_102182855(TXNRD1)	K22182
Human Diseases	Infectious diseases	Shigellosis	3	72	0.405927	0.806176	ko05131	ncbi_102173438(RAC1);ncbi_102175206(CRKL);ncbi_102177406(IKBKB)	K04392+K04438+K07209
Human Diseases	Cancers	Choline metabolism in cancer	4	103	0.419349	0.807799	ko05231	ncbi_102173438(RAC1);ncbi_102178930(PLA2G4A);ncbi_102182422(LYPLA1);ncbi_102188846(SLC22A4)	K04392+K16342+K06128+K08202
Organismal Systems	Immune system	Intestinal immune network for IgA production	2	45	0.424143	0.807799	ko04672	ncbi_102180664(LOC102180664);ncbi_102180957(IL15)	K06752+K05433
Metabolism	Glycan biosynthesis and metabolism	Glycosphingolipid biosynthesis - globo and isoglobo series	1	17	0.424659	0.807799	ko00603	ncbi_102170679(NAGA)	K01204
Metabolism	Global and overview maps	2-Oxocarboxylic acid metabolism	1	17	0.424659	0.807799	ko01210	ncbi_102190495(ACO2)	K01681
Metabolism	Carbohydrate metabolism	Inositol phosphate metabolism	3	75	0.431694	0.807799	ko00562	ncbi_102171561(PIK3C3);ncbi_102177151(LOC102177151);ncbi_102177585(IPMK)	K00914+K18083+K00915
Organismal Systems	Immune system	Th17 cell differentiation	4	105	0.433758	0.807799	ko04659	ncbi_102170884(PRKCQ);ncbi_102177406(IKBKB);ncbi_102180664(LOC102180664);ncbi_102189572(IL27RA)	K18052+K07209+K06752+K19598
Human Diseases	Infectious diseases	Pathogenic Escherichia coli infection	4	105	0.433758	0.807799	ko05130	ncbi_100860844(TLR5);ncbi_102172952(LOC102172952);ncbi_102179515(LOC102179515);ncbi_102181781(EZR)	K10168+K07375+K07604+K08007
Organismal Systems	Endocrine system	Estrogen signaling pathway	5	135	0.433905	0.807799	ko04915	ncbi_102169302(NCOA1);ncbi_102169557(ADCY6);ncbi_102179515(LOC102179515);ncbi_102179773(SHC4);ncbi_102188874(LOC102188874)	K09101+K08046+K07604+K17449+K04632
Cellular Processes	Cell growth and death	Ferroptosis	2	46	0.435188	0.807799	ko04216	ncbi_102170945(PCBP2);ncbi_102190935(LOC102190935)	K13162+K21398
Environmental Information Processing	Signal transduction	Notch signaling pathway	2	46	0.435188	0.807799	ko04330	ncbi_102182879(PSEN1);ncbi_102185075(RBPJ)	K04505+K06053
Organismal Systems	Excretory system	Vasopressin-regulated water reabsorption	2	47	0.446117	0.82271	ko04962	ncbi_102169557(ADCY6);ncbi_102188874(LOC102188874)	K08046+K04632
Metabolism	Metabolism of cofactors and vitamins	Porphyrin and chlorophyll metabolism	2	48	0.456928	0.832065	ko00860	ncbi_102177459(MMAB);ncbi_102186822(UROD)	K00798+K01599
Organismal Systems	Immune system	Antigen processing and presentation	3	78	0.45705	0.832065	ko04612	ncbi_102172138(LOC102172138);ncbi_102180664(LOC102180664);ncbi_102185917(LOC102185917)	K06751+K06752+K06751
Organismal Systems	Digestive system	Gastric acid secretion	3	79	0.465397	0.841865	ko04971	ncbi_102169557(ADCY6);ncbi_102181781(EZR);ncbi_102188874(LOC102188874)	K08046+K08007+K04632
Cellular Processes	Cellular community - eukaryotes	Signaling pathways regulating pluripotency of stem cells	5	141	0.471536	0.846084	ko04550	ncbi_100861165(IGF1R);ncbi_102176275(ACVR2B);ncbi_102183645(RIF1);ncbi_102184837(ZFHX3);ncbi_102185881(ID3)	K05087+K13596+K11138+K09378+K17694
Genetic Information Processing	Folding, sorting and degradation	RNA degradation	3	80	0.473688	0.846084	ko03018	ncbi_100861238(HSPD1);ncbi_102175883(LSM6);ncbi_102189039(DIS3L)	K04077+K12625+K18681
Metabolism	Glycan biosynthesis and metabolism	Other glycan degradation	1	21	0.494915	0.869282	ko00511	ncbi_102179566(FUCA2)	K01206
Environmental Information Processing	Signal transduction	MAPK signaling pathway - fly	3	83	0.498199	0.869282	ko04013	ncbi_102173178(MAP2K7);ncbi_102173438(RAC1);ncbi_102188484(TEC)	K04431+K04392+K07364
Metabolism	Lipid metabolism	Ether lipid metabolism	2	52	0.498919	0.869282	ko00565	ncbi_102178930(PLA2G4A);ncbi_102181532(PAFAH1B1)	K16342+K16794
Cellular Processes	Cell growth and death	Apoptosis - fly	2	52	0.498919	0.869282	ko04214	ncbi_102173178(MAP2K7);ncbi_102180018(DNM1L)	K04431+K17065
Human Diseases	Cancers	Hepatocellular carcinoma	6	178	0.506348	0.876847	ko05225	ncbi_100861165(IGF1R);ncbi_102179773(SHC4);ncbi_102181186(MET);ncbi_102182855(TXNRD1);ncbi_102183886(RB1);ncbi_102188317(GADD45G)	K05087+K17449+K05099+K22182+K06618+K04402
Human Diseases	Cancers	Breast cancer	5	148	0.514395	0.884999	ko05224	ncbi_100861165(IGF1R);ncbi_102169302(NCOA1);ncbi_102179773(SHC4);ncbi_102183886(RB1);ncbi_102188317(GADD45G)	K05087+K09101+K17449+K06618+K04402
Human Diseases	Infectious diseases	African trypanosomiasis	2	54	0.519124	0.884999	ko05143	ncbi_102172606(LOC102172606);ncbi_102187771(F2RL1)	K14480+K04234
Environmental Information Processing	Signal transduction	Wnt signaling pathway	5	149	0.520405	0.884999	ko04310	ncbi_102169344(RUVBL1);ncbi_102173438(RAC1);ncbi_102180576(LOC102180576);ncbi_102182879(PSEN1);ncbi_102191141(CHD8)	K04499+K04392+K08960+K04505+K04494
Environmental Information Processing	Signal transduction	ErbB signaling pathway	3	87	0.529964	0.895891	ko04012	ncbi_102173178(MAP2K7);ncbi_102175206(CRKL);ncbi_102179773(SHC4)	K04431+K04438+K17449
Human Diseases	Endocrine and metabolic diseases	Non-alcoholic fatty liver disease (NAFLD)	5	152	0.538241	0.903682	ko04932	ncbi_100860906(NR1H3);ncbi_102168996(INSR);ncbi_102169928(PRKAB2);ncbi_102173438(RAC1);ncbi_102177406(IKBKB)	K08536+K04527+K07199+K04392+K07209
Genetic Information Processing	Folding, sorting and degradation	Protein export	1	24	0.541937	0.903682	ko03060	ncbi_102180702(SEC62)	K12275
Organismal Systems	Endocrine system	Oxytocin signaling pathway	5	153	0.544119	0.903682	ko04921	ncbi_102169557(ADCY6);ncbi_102169928(PRKAB2);ncbi_102178930(PLA2G4A);ncbi_102181773(PPP1R12B);ncbi_102188874(LOC102188874)	K08046+K07199+K16342+K12329+K04632
Human Diseases	Cancers	Gastric cancer	5	154	0.549962	0.905359	ko05226	ncbi_102179773(SHC4);ncbi_102181186(MET);ncbi_102181726(MLH1);ncbi_102183886(RB1);ncbi_102188317(GADD45G)	K17449+K05099+K08734+K06618+K04402
Metabolism	Glycan biosynthesis and metabolism	Glycosylphosphatidylinositol(GPI)-anchor biosynthesis	1	25	0.55662	0.905359	ko00563	ncbi_102187091(PIGM)	K05284
Human Diseases	Immune diseases	Asthma	1	25	0.55662	0.905359	ko05310	ncbi_102180664(LOC102180664)	K06752
Human Diseases	Cancers	Endometrial cancer	2	58	0.55788	0.905359	ko05213	ncbi_102181726(MLH1);ncbi_102188317(GADD45G)	K08734+K04402
Human Diseases	Cancers	Proteoglycans in cancer	7	221	0.564414	0.910758	ko05205	ncbi_100861165(IGF1R);ncbi_102168557(RDX);ncbi_102173438(RAC1);ncbi_102181186(MET);ncbi_102181773(PPP1R12B);ncbi_102181781(EZR);ncbi_102187630(FLNB)	K05087+K05762+K04392+K05099+K12329+K08007+K04437
Human Diseases	Cardiovascular diseases	Dilated cardiomyopathy (DCM)	3	94	0.582742	0.927515	ko05414	ncbi_102169557(ADCY6);ncbi_102170148(PLN);ncbi_102188874(LOC102188874)	K08046+K05852+K04632
Organismal Systems	Endocrine system	Relaxin signaling pathway	5	160	0.58424	0.927515	ko04926	ncbi_102169557(ADCY6);ncbi_102173178(MAP2K7);ncbi_102179773(SHC4);ncbi_102188874(LOC102188874);ncbi_102191486(ACTA2)	K08046+K04431+K17449+K04632+K12313
Organismal Systems	Digestive system	Vitamin digestion and absorption	1	27	0.584596	0.927515	ko04977	ncbi_102177770(ABCC1)	K05665
Human Diseases	Immune diseases	Inflammatiory bowel disease (IBD)	2	63	0.603134	0.928051	ko05321	ncbi_100860844(TLR5);ncbi_102180664(LOC102180664)	K10168+K06752
Organismal Systems	Environmental adaptation	Circadian entrainment	3	97	0.604185	0.928051	ko04713	ncbi_102169557(ADCY6);ncbi_102182753(PRKG1);ncbi_102188874(LOC102188874)	K08046+K07376+K04632
Organismal Systems	Digestive system	Salivary secretion	3	97	0.604185	0.928051	ko04970	ncbi_102169557(ADCY6);ncbi_102182753(PRKG1);ncbi_102188874(LOC102188874)	K08046+K07376+K04632
Organismal Systems	Sensory system	Phototransduction - fly	1	29	0.610812	0.928051	ko04745	ncbi_102185296(GRK3)	K00910
Environmental Information Processing	Signal transduction	cGMP - PKG signaling pathway	5	166	0.617075	0.928051	ko04022	ncbi_102168996(INSR);ncbi_102169557(ADCY6);ncbi_102170148(PLN);ncbi_102182753(PRKG1);ncbi_102185175(GNA12)	K04527+K08046+K05852+K07376+K04346
Metabolism	Carbohydrate metabolism	Pentose phosphate pathway	1	30	0.623295	0.928051	ko00030	ncbi_102174732(PGM2)	K15779
Metabolism	Metabolism of cofactors and vitamins	Folate biosynthesis	1	30	0.623295	0.928051	ko00790	ncbi_102177793(PCBD2)	K01724
Organismal Systems	Endocrine system	Renin-angiotensin system	1	30	0.623295	0.928051	ko04614	ncbi_102173817(PRCP)	K01285
Organismal Systems	Endocrine system	Cortisol synthesis and secretion	2	66	0.628569	0.928051	ko04927	ncbi_102169557(ADCY6);ncbi_102188874(LOC102188874)	K08046+K04632
Metabolism	Carbohydrate metabolism	Galactose metabolism	1	31	0.63538	0.928051	ko00052	ncbi_102174732(PGM2)	K15779
Human Diseases	Infectious diseases	Leishmaniasis	2	68	0.644813	0.928051	ko05140	ncbi_102171575(IRAK4);ncbi_102180664(LOC102180664)	K04733+K06752
Environmental Information Processing	Signal transduction	Phosphatidylinositol signaling system	3	103	0.644846	0.928051	ko04070	ncbi_102171561(PIK3C3);ncbi_102177151(LOC102177151);ncbi_102177585(IPMK)	K00914+K18083+K00915
Metabolism	Glycan biosynthesis and metabolism	Mucin type O-glycan biosynthesis	1	32	0.647078	0.928051	ko00512	ncbi_102177245(GALNT16)	K00710
Metabolism	Carbohydrate metabolism	Glyoxylate and dicarboxylate metabolism	1	32	0.647078	0.928051	ko00630	ncbi_102190495(ACO2)	K01681
Metabolism	Metabolism of cofactors and vitamins	Nicotinate and nicotinamide metabolism	1	32	0.647078	0.928051	ko00760	ncbi_102169244(QPRT)	K00767
Organismal Systems	Endocrine system	Renin secretion	2	69	0.652723	0.928051	ko04924	ncbi_102169557(ADCY6);ncbi_102188874(LOC102188874)	K08046+K04632
Human Diseases	Cancers	Non-small cell lung cancer	2	69	0.652723	0.928051	ko05223	ncbi_102183886(RB1);ncbi_102188317(GADD45G)	K06618+K04402
Organismal Systems	Endocrine system	Glucagon signaling pathway	3	105	0.657729	0.928051	ko04922	ncbi_102169928(PRKAB2);ncbi_102188874(LOC102188874);ncbi_102191654(SIK1)	K07199+K04632+K19008
Metabolism	Lipid metabolism	Fatty acid elongation	1	33	0.658402	0.928051	ko00062	ncbi_102190073(HACD2)	K10703
Metabolism	Carbohydrate metabolism	Starch and sucrose metabolism	1	33	0.658402	0.928051	ko00500	ncbi_102174732(PGM2)	K15779
Genetic Information Processing	Replication and repair	Base excision repair	1	33	0.658402	0.928051	ko03410	ncbi_102186980(POLD3)	K03504
Environmental Information Processing	Signal transduction	Apelin signaling pathway	4	140	0.65964	0.928051	ko04371	ncbi_102169557(ADCY6);ncbi_102169928(PRKAB2);ncbi_102171561(PIK3C3);ncbi_102191486(ACTA2)	K08046+K07199+K00914+K12313
Human Diseases	Cancers	Acute myeloid leukemia	2	70	0.660493	0.928051	ko05221	ncbi_102177406(IKBKB);ncbi_106502311(LOC106502311)	K07209+K05427
Organismal Systems	Digestive system	Pancreatic secretion	3	106	0.664043	0.928051	ko04972	ncbi_102169557(ADCY6);ncbi_102173438(RAC1);ncbi_102188874(LOC102188874)	K08046+K04392+K04632
Organismal Systems	Endocrine system	Parathyroid hormone synthesis, secretion and action	3	108	0.676419	0.928051	ko04928	ncbi_102169557(ADCY6);ncbi_102185175(GNA12);ncbi_102188874(LOC102188874)	K08046+K04346+K04632
Organismal Systems	Immune system	Natural killer cell mediated cytotoxicity	5	178	0.677974	0.928051	ko04650	ncbi_102172138(LOC102172138);ncbi_102173438(RAC1);ncbi_102179773(SHC4);ncbi_102185917(LOC102185917);ncbi_106502311(LOC106502311)	K06751+K04392+K17449+K06751+K05427
Genetic Information Processing	Folding, sorting and degradation	SNARE interactions in vesicular transport	1	35	0.679976	0.928051	ko04130	ncbi_102174392(STX17)	K08491
Human Diseases	Cardiovascular diseases	Fluid shear stress and atherosclerosis	4	144	0.681246	0.928051	ko05418	ncbi_102173178(MAP2K7);ncbi_102173438(RAC1);ncbi_102176275(ACVR2B);ncbi_102177406(IKBKB)	K04431+K04392+K13596+K07209
Metabolism	Lipid metabolism	Steroid hormone biosynthesis	2	73	0.682967	0.928051	ko00140	ncbi_102180581(SRD5A3);ncbi_102187232(SRD5A2)	K12345+K12344
Human Diseases	Infectious diseases	Pertussis	2	73	0.682967	0.928051	ko05133	ncbi_102170774(TICAM1);ncbi_102171575(IRAK4)	K05842+K04733
Metabolism	Global and overview maps	Biosynthesis of amino acids	2	75	0.697267	0.934398	ko01230	ncbi_102179922(PC);ncbi_102190495(ACO2)	K01958+K01681
Metabolism	Carbohydrate metabolism	Pyruvate metabolism	1	37	0.700192	0.934398	ko00620	ncbi_102179922(PC)	K01958
Human Diseases	Infectious diseases	Toxoplasmosis	3	113	0.705881	0.934398	ko05145	ncbi_102171575(IRAK4);ncbi_102177406(IKBKB);ncbi_102180664(LOC102180664)	K04733+K07209+K06752
Human Diseases	Cancers	Thyroid cancer	1	38	0.709817	0.934398	ko05216	ncbi_102188317(GADD45G)	K04402
Organismal Systems	Immune system	B cell receptor signaling pathway	2	77	0.711029	0.934398	ko04662	ncbi_102173438(RAC1);ncbi_102177406(IKBKB)	K04392+K07209
Organismal Systems	Immune system	Platelet activation	4	151	0.716716	0.934398	ko04611	ncbi_102169557(ADCY6);ncbi_102178930(PLA2G4A);ncbi_102182753(PRKG1);ncbi_102188874(LOC102188874)	K08046+K16342+K07376+K04632
Environmental Information Processing	Signal transduction	HIF-1 signaling pathway	3	115	0.717079	0.934398	ko04066	ncbi_100861165(IGF1R);ncbi_102168996(INSR);ncbi_102189773(ANGPT1)	K05087+K04527+K05465
Organismal Systems	Immune system	Leukocyte transendothelial migration	3	115	0.717079	0.934398	ko04670	ncbi_102173438(RAC1);ncbi_102174643(RHOH);ncbi_102181781(EZR)	K04392+K07873+K08007
Human Diseases	Cancers	Bladder cancer	1	39	0.719135	0.934398	ko05219	ncbi_102183886(RB1)	K06618
Human Diseases	Infectious diseases	Hepatitis B	4	152	0.72154	0.934398	ko05161	ncbi_102170760(FADD);ncbi_102170774(TICAM1);ncbi_102177406(IKBKB);ncbi_102183886(RB1)	K02373+K05842+K07209+K06618
Organismal Systems	Sensory system	Taste transduction	2	79	0.724267	0.934398	ko04742	ncbi_102168441(CACNA1A);ncbi_102169557(ADCY6)	K04344+K08046
Human Diseases	Infectious diseases	Staphylococcus aureus infection	2	80	0.730692	0.934398	ko05150	ncbi_102179515(LOC102179515);ncbi_102180664(LOC102180664)	K07604+K06752
Metabolism	Global and overview maps	Carbon metabolism	3	118	0.733256	0.934398	ko01200	ncbi_102179922(PC);ncbi_102183291(OGDH);ncbi_102190495(ACO2)	K01958+K00164+K01681
Environmental Information Processing	Signal transduction	Hippo signaling pathway	4	155	0.735647	0.934398	ko04390	ncbi_102170445(TEAD1);ncbi_102180576(LOC102180576);ncbi_102181952(PPP2R2A);ncbi_102188298(PPP2R2C)	K09448+K08960+K04354+K04354
Environmental Information Processing	Membrane transport	ABC transporters	2	81	0.73699	0.934398	ko02010	ncbi_102177770(ABCC1);ncbi_102186159(ABCC5)	K05665+K05668
Metabolism	Global and overview maps	Metabolic pathways	40	1360	0.745125	0.936619	ko01100	ncbi_100860963(DAD1);ncbi_100861103(OXSM);ncbi_102168846(B3GNT4);ncbi_102169244(QPRT);ncbi_102169483(ATP6V1E2);ncbi_102169493(PTDSS1);ncbi_102170580(AGPAT5);ncbi_102170679(NAGA);ncbi_102171294(DCTPP1);ncbi_102171561(PIK3C3);ncbi_102174167(POLR2D);ncbi_102174473(DSE);ncbi_102174732(PGM2);ncbi_102176969(POLR1B);ncbi_102177151(LOC102177151);ncbi_102177162(ATP6V1G1);ncbi_102177176(NFS1);ncbi_10217724…	K12668+K09458+K07971+K00767+K02150+K08729+K19007+K01204+K16904+K00914+K03012+K01794+K15779+K03002+K18083+K02152+K04487+K00710+K00798+K00915+K00232+K01724+K16342+K00819+K01958+K16794+K00747+K00939+K08683+K02367+K00164+K18532+K01599+K03504+K05284+K00771+K10703+K01681+K03022+K07635
Human Diseases	Substance dependence	Nicotine addiction	1	42	0.745338	0.936619	ko05033	ncbi_102168441(CACNA1A)	K04344
Genetic Information Processing	Translation	Aminoacyl-tRNA biosynthesis	1	44	0.761438	0.939663	ko00970	ncbi_102169829(GARS)	K01880
Environmental Information Processing	Signal transduction	cAMP signaling pathway	6	235	0.768146	0.939663	ko04024	ncbi_102169557(ADCY6);ncbi_102170148(PLN);ncbi_102173438(RAC1);ncbi_102177788(ACOX3);ncbi_102188874(LOC102188874);ncbi_102189146(HCAR2)	K08046+K05852+K04392+K00232+K04632+K08402
Metabolism	Lipid metabolism	Linoleic acid metabolism	1	45	0.769104	0.939663	ko00591	ncbi_102178930(PLA2G4A)	K16342
Organismal Systems	Endocrine system	Thyroid hormone signaling pathway	3	127	0.777438	0.939663	ko04919	ncbi_102169302(NCOA1);ncbi_102170148(PLN);ncbi_102186338(THRA)	K09101+K05852+K05547
Organismal Systems	Endocrine system	Insulin secretion	2	88	0.77765	0.939663	ko04911	ncbi_102169557(ADCY6);ncbi_102188874(LOC102188874)	K08046+K04632
Organismal Systems	Aging	Longevity regulating pathway - worm	2	89	0.782988	0.939663	ko04212	ncbi_100861238(HSPD1);ncbi_102168996(INSR)	K04077+K04527
Organismal Systems	Immune system	Complement and coagulation cascades	2	89	0.782988	0.939663	ko04610	ncbi_102180910(ITGAX);ncbi_102190058(F5)	K06462+K03902
Organismal Systems	Nervous system	Serotonergic synapse	3	129	0.786401	0.939663	ko04726	ncbi_102168441(CACNA1A);ncbi_102178930(PLA2G4A);ncbi_102188874(LOC102188874)	K04344+K16342+K04632
Cellular Processes	Cell growth and death	p53 signaling pathway	2	90	0.788214	0.939663	ko04115	ncbi_102175063(PMAIP1);ncbi_102188317(GADD45G)	K10131+K04402
Metabolism	Amino acid metabolism	Tryptophan metabolism	1	48	0.79066	0.939663	ko00380	ncbi_102183291(OGDH)	K00164
Organismal Systems	Endocrine system	PPAR signaling pathway	2	91	0.79333	0.939663	ko03320	ncbi_100860906(NR1H3);ncbi_102177788(ACOX3)	K08536+K00232
Human Diseases	Neurodegenerative diseases	Alzheimer disease	4	169	0.794423	0.939663	ko05010	ncbi_102170760(FADD);ncbi_102180953(BACE1);ncbi_102182021(HSD17B10);ncbi_102182879(PSEN1)	K02373+K04521+K08683+K04505
Environmental Information Processing	Signal transduction	Jak-STAT signaling pathway	5	207	0.797079	0.939663	ko04630	ncbi_102180957(IL15);ncbi_102182229(IL20RA);ncbi_102184003(OSMR);ncbi_102189572(IL27RA);ncbi_106502311(LOC106502311)	K05433+K05136+K05057+K19598+K05427
Metabolism	Lipid metabolism	Fatty acid degradation	1	49	0.79739	0.939663	ko00071	ncbi_102177788(ACOX3)	K00232
Organismal Systems	Digestive system	Carbohydrate digestion and absorption	1	49	0.79739	0.939663	ko04973	ncbi_102178379(LOC102178379)	K08143
Metabolism	Carbohydrate metabolism	Amino sugar and nucleotide sugar metabolism	1	51	0.81021	0.946258	ko00520	ncbi_102174732(PGM2)	K15779
Organismal Systems	Nervous system	GABAergic synapse	2	95	0.812718	0.946258	ko04727	ncbi_102168441(CACNA1A);ncbi_102169557(ADCY6)	K04344+K08046
Metabolism	Glycan biosynthesis and metabolism	N-Glycan biosynthesis	1	52	0.816314	0.946258	ko00510	ncbi_100860963(DAD1)	K12668
Human Diseases	Infectious diseases	Malaria	1	52	0.816314	0.946258	ko05144	ncbi_102181186(MET)	K05099
Human Diseases	Substance dependence	Cocaine addiction	1	53	0.822222	0.947254	ko05030	ncbi_102188874(LOC102188874)	K04632
Metabolism	Amino acid metabolism	Arginine and proline metabolism	1	54	0.827941	0.947254	ko00330	ncbi_102179910(OAT)	K00819
Human Diseases	Neurodegenerative diseases	Amyotrophic lateral sclerosis (ALS)	1	54	0.827941	0.947254	ko05014	ncbi_102173438(RAC1)	K04392
Metabolism	Amino acid metabolism	Valine, leucine and isoleucine degradation	1	55	0.833476	0.947254	ko00280	ncbi_102182021(HSD17B10)	K08683
Organismal Systems	Endocrine system	Melanogenesis	2	100	0.834666	0.947254	ko04916	ncbi_102169557(ADCY6);ncbi_102188874(LOC102188874)	K08046+K04632
Organismal Systems	Endocrine system	Aldosterone synthesis and secretion	2	101	0.838768	0.947254	ko04925	ncbi_102169557(ADCY6);ncbi_102188874(LOC102188874)	K08046+K04632
Organismal Systems	Immune system	C-type lectin receptor signaling pathway	2	103	0.846697	0.947254	ko04625	ncbi_102177406(IKBKB);ncbi_102184079(MAPKAPK2)	K07209+K04443
Organismal Systems	Nervous system	Retrograde endocannabinoid signaling	3	145	0.847828	0.947254	ko04723	ncbi_102168441(CACNA1A);ncbi_102169557(ADCY6);ncbi_102189544(NAPEPLD)	K04344+K08046+K13985
Human Diseases	Infectious diseases	Measles	3	145	0.847828	0.947254	ko05162	ncbi_102169659(RAB9A);ncbi_102170884(PRKCQ);ncbi_102171575(IRAK4)	K07899+K18052+K04733
Organismal Systems	Immune system	Hematopoietic cell lineage	2	104	0.850528	0.947254	ko04640	ncbi_102180664(LOC102180664);ncbi_106502311(LOC106502311)	K06752+K05427
Organismal Systems	Environmental adaptation	Thermogenesis	5	227	0.856986	0.948654	ko04714	ncbi_102169557(ADCY6);ncbi_102169928(PRKAB2);ncbi_102182511(LOC102182511);ncbi_102182753(PRKG1);ncbi_102188874(LOC102188874)	K08046+K07199+K18178+K07376+K04632
Environmental Information Processing	Signaling molecules and interaction	Cytokine-cytokine receptor interaction	8	342	0.861907	0.948654	ko04060	ncbi_100860884(IL16);ncbi_102169022(TNFRSF19);ncbi_102176275(ACVR2B);ncbi_102180957(IL15);ncbi_102182229(IL20RA);ncbi_102184003(OSMR);ncbi_102189572(IL27RA);ncbi_106502311(LOC106502311)	K22628+K05155+K13596+K05433+K05136+K05057+K19598+K05427
Organismal Systems	Digestive system	Mineral absorption	1	62	0.867562	0.948654	ko04978	ncbi_102190935(LOC102190935)	K21398
Human Diseases	Infectious diseases	Amoebiasis	3	152	0.8695	0.948654	ko05146	ncbi_102180906(LOC102180906);ncbi_102188874(LOC102188874);ncbi_106502311(LOC106502311)	K13963+K04632+K05427
Cellular Processes	Transport and catabolism	Mitophagy - animal	1	63	0.871827	0.948654	ko04137	ncbi_102175373(BCL2L13)	K15485
Human Diseases	Cancers	Basal cell carcinoma	1	63	0.871827	0.948654	ko05217	ncbi_102188317(GADD45G)	K04402
Human Diseases	Endocrine and metabolic diseases	Cushing syndrome	3	156	0.880626	0.951303	ko04934	ncbi_102169557(ADCY6);ncbi_102183886(RB1);ncbi_102188874(LOC102188874)	K08046+K06618+K04632
Metabolism	Carbohydrate metabolism	Glycolysis / Gluconeogenesis	1	66	0.883818	0.951303	ko00010	ncbi_102174732(PGM2)	K15779
Organismal Systems	Nervous system	Cholinergic synapse	2	114	0.88431	0.951303	ko04725	ncbi_102168441(CACNA1A);ncbi_102169557(ADCY6)	K04344+K08046
Metabolism	Lipid metabolism	Glycerolipid metabolism	1	69	0.894691	0.958839	ko00561	ncbi_102170580(AGPAT5)	K19007
Human Diseases	Cancers	Central carbon metabolism in cancer	1	71	0.90137	0.962143	ko05230	ncbi_102181186(MET)	K05099
Human Diseases	Substance dependence	Amphetamine addiction	1	72	0.90455	0.962143	ko05031	ncbi_102188874(LOC102188874)	K04632
Metabolism	Energy metabolism	Oxidative phosphorylation	2	129	0.921974	0.966372	ko00190	ncbi_102169483(ATP6V1E2);ncbi_102177162(ATP6V1G1)	K02150+K02152
Human Diseases	Immune diseases	Systemic lupus erythematosus	2	129	0.921974	0.966372	ko05322	ncbi_102180664(LOC102180664);ncbi_102186786(TRIM21)	K06752+K10651
Organismal Systems	Digestive system	Bile secretion	2	130	0.924024	0.966372	ko04976	ncbi_102169557(ADCY6);ncbi_102188874(LOC102188874)	K08046+K04632
Organismal Systems	Endocrine system	Prolactin signaling pathway	1	80	0.926572	0.966372	ko04917	ncbi_102179773(SHC4)	K17449
Organismal Systems	Circulatory system	Cardiac muscle contraction	1	81	0.928942	0.966372	ko04260	ncbi_102170209(SLC9A6)	K12041
Human Diseases	Cardiovascular diseases	Arrhythmogenic right ventricular cardiomyopathy (ARVC)	1	81	0.928942	0.966372	ko05412	ncbi_102184211(LOC102184211)	K07601
Metabolism	Lipid metabolism	Arachidonic acid metabolism	1	87	0.941643	0.97601	ko00590	ncbi_102178930(PLA2G4A)	K16342
Human Diseases	Cardiovascular diseases	Hypertrophic cardiomyopathy (HCM)	1	90	0.947118	0.978115	ko05410	ncbi_102169928(PRKAB2)	K07199
Environmental Information Processing	Signal transduction	Calcium signaling pathway	3	195	0.952066	0.979662	ko04020	ncbi_102168441(CACNA1A);ncbi_102170148(PLN);ncbi_102188874(LOC102188874)	K04344+K05852+K04632
Environmental Information Processing	Signaling molecules and interaction	ECM-receptor interaction	1	102	0.964354	0.988724	ko04512	ncbi_102178669(COL6A5)	K06238
Organismal Systems	Digestive system	Protein digestion and absorption	2	162	0.968246	0.989143	ko04974	ncbi_102173817(PRCP);ncbi_102178669(COL6A5)	K01285+K06238
Environmental Information Processing	Signaling molecules and interaction	Neuroactive ligand-receptor interaction	4	288	0.984254	0.991703	ko04080	ncbi_102183611(LPAR6);ncbi_102186338(THRA);ncbi_102187771(F2RL1);ncbi_102189399(LPAR1)	K04273+K05547+K04234+K04289
Human Diseases	Substance dependence	Alcoholism	2	188	0.984743	0.991703	ko05034	ncbi_102179773(SHC4);ncbi_102188874(LOC102188874)	K17449+K04632
Human Diseases	Neurodegenerative diseases	Huntington disease	2	191	0.985996	0.991703	ko05016	ncbi_102174167(POLR2D);ncbi_102191456(CLTC)	K03012+K04646
Human Diseases	Endocrine and metabolic diseases	AGE-RAGE signaling pathway in diabetic complications	1	133	0.987167	0.991703	ko04933	ncbi_102173438(RAC1)	K04392
Genetic Information Processing	Translation	Ribosome	2	197	0.988211	0.991703	ko03010	ncbi_102170167(MRPL16);ncbi_102176709(MRPL17)	K02878+K02879
Organismal Systems	Sensory system	Olfactory transduction	2	1037	1	1	ko04740	ncbi_102182753(PRKG1);ncbi_102185296(GRK3)	K07376+K00910
